# Supplementary material for: Automated bone marrow cytology using deep learning to generate a histogram of cell types
Source: PubMed Central journal article supplement (PMC9053230; doi:10.1038/s43856-022-00107-6), 2022-04-20
Supplement: 43856_2022_107_MOESM2_ESM.pdf [file 43856_2022_107_MOESM2_ESM.pdf]

## **Description of Additional Supplementary Files**

**File Name:** Supplementary Data 1

**Description:** Source data
