# Supplementary material for: Automated bone marrow cytology using deep learning to generate a histogram of cell types
Source: PubMed Central journal article supplement (PMC9053230; doi:10.1038/s43856-022-00107-6), 2022-04-20
Supplement: 43856_2022_107_MOESM3_ESM.pdf [file 43856_2022_107_MOESM3_ESM.pdf]

## Supplementary Information

| Tiles               | Number of annotated tiles in dataset | Number of annotated and augmented tiles in the training set |
|---------------------|--------------------------------------|-------------------------------------------------------------|
| Inappropriate Tiles | 70250                                | 70250                                                       |
| Appropriate Tiles   | 4750                                 | 28500                                                       |

Table S1: The number of annotated and augmented tiles in our prepared dataset from 250 individual patients' WSIs to use in training of the proposed ROI detection model.

| Object class                | Number of annotated objects in dataset | Number of annotated and augmented objects in the training set |
|-----------------------------|----------------------------------------|---------------------------------------------------------------|
| Neutrophil                  | 2714                                   | 119416                                                        |
| Metamyelocyte               | 1017                                   | 44748                                                         |
| Myelocyte                   | 1199                                   | 52756                                                         |
| Promyelocyte                | 409                                    | 17996                                                         |
| Blast                       | 3950                                   | 173800                                                        |
| Erythroblast                | 2668                                   | 117392                                                        |
| Megakaryocyte nucleus       | 23                                     | 1012                                                          |
| Lymphocyte                  | 1305                                   | 57420                                                         |
| Monocyte                    | 569                                    | 25036                                                         |
| Plasma cell                 | 176                                    | 7744                                                          |
| Eosinophil                  | 249                                    | 10956                                                         |
| Basophil                    | 7                                      | 308                                                           |
| Megakaryocyte               | 106                                    | 4664                                                          |
| Debris                      | 5603                                   | 246532                                                        |
| Histiocyte                  | 191                                    | 8404                                                          |
| Mast cell                   | 33                                     | 1452                                                          |
| Platelet                    | 3971                                   | 174724                                                        |
| Platelet clump              | 585                                    | 25740                                                         |
| Other cell                  | 2007                                   | 88308                                                         |
| <b>Total cell annotated</b> | <b>26782</b>                           | <b>1178408</b>                                                |

Table S2: The number of annotated and augmented cellular (white blood cells) and non-cellular objects classes in our prepared dataset belong to 500 individual patients' WSIs to use in training of the proposed cell detection and classification model.

| Diagnostic tags                   | Used in Training | Used in Test-Validation | Extra annotated data used in Test-Validation | Number of patients |
|-----------------------------------|------------------|-------------------------|----------------------------------------------|--------------------|
| Normal                            | 16               | 4                       | 12                                           | 32                 |
| Myelodysplastic syndrome (MDS)    | 10               | 2                       | 12                                           | 24                 |
| Acute leukemia                    | 10               | 4                       | 3                                            | 17                 |
| Lymphoproliferative disorder      | 8                | 3                       | N/A                                          | 11                 |
| Plasma cell neoplasm              | 7                | 5                       | N/A                                          | 12                 |
| Hypercellular                     | 1                | 1                       | N/A                                          | 2                  |
| Erythroid hyperplasia             | 1                | 0                       | N/A                                          | 1                  |
| Myeloproliferative neoplasm (MPN) | 2                | 1                       | N/A                                          | 3                  |
| Inadequate                        | 2                | 1                       | N/A                                          | 3                  |
| Hypocellular                      | 1                | 0                       | N/A                                          | 1                  |
| Total                             | 58               | 21                      | N/A                                          | 106                |

Table S3: Diagnostic tags and the number of patient WSI used for training and test-validation in each category for the cell detection and classification model. The extra annotated data column, shows the number of new cases that annotated and assessed by the expert hematopathologists to evaluate normal, MDS and acute leukemia cases.

| Cell Type             | AP. I1      | AP. I2      | AP. I3      | AP. I4      | AP. I5      | AP. I6      | AP. I7      | AP. I8      |
|-----------------------|-------------|-------------|-------------|-------------|-------------|-------------|-------------|-------------|
| Neutrophil            | 0.72        | 0.78        | 0.83        | 0.86        | 0.87        | 0.90        | 0.92        | 0.90        |
| Metamyelocyte         | 0.56        | 0.63        | 0.70        | 0.73        | 0.74        | 0.74        | 0.75        | 0.77        |
| Myelocyte             | 0.53        | 0.54        | 0.58        | 0.61        | 0.69        | 0.76        | 0.80        | 0.80        |
| Promyelocyte          | 0.41        | 0.45        | 0.56        | 0.55        | 0.60        | 0.60        | 0.62        | 0.62        |
| Blast                 | 0.63        | 0.71        | 0.79        | 0.80        | 0.80        | 0.82        | 0.82        | 0.84        |
| Erythroblast          | 0.69        | 0.75        | 0.78        | 0.84        | 0.87        | 0.91        | 0.91        | 0.92        |
| Megakaryocyte nucleus | 0.28        | 0.36        | 0.48        | 0.57        | 0.56        | 0.59        | 0.60        | 0.60        |
| Lymphocyte            | 0.45        | 0.47        | 0.51        | 0.52        | 0.54        | 0.61        | 0.64        | 0.66        |
| Monocyte              | 0.48        | 0.53        | 0.56        | 0.63        | 0.65        | 0.65        | 0.69        | 0.72        |
| Plasma cell           | 0.55        | 0.57        | 0.62        | 0.66        | 0.68        | 0.70        | 0.71        | 0.72        |
| Eosinophil            | 0.57        | 0.62        | 0.79        | 0.85        | 0.89        | 0.90        | 0.94        | 0.97        |
| Megakaryocyte         | 0.46        | 0.50        | 0.75        | 0.79        | 0.79        | 0.79        | 0.80        | 0.82        |
| Debris                | 0.54        | 0.61        | 0.62        | 0.70        | 0.73        | 0.78        | 0.77        | 0.79        |
| Histiocyte            | 0.30        | 0.39        | 0.44        | 0.50        | 0.51        | 0.52        | 0.52        | 0.54        |
| Platelet              | 0.39        | 0.43        | 0.47        | 0.53        | 0.60        | 0.64        | 0.66        | 0.64        |
| Platelet clump        | 0.38        | 0.39        | 0.42        | 0.53        | 0.59        | 0.57        | 0.62        | 0.62        |
| <b>Average</b>        | <b>0.50</b> | <b>0.55</b> | <b>0.62</b> | <b>0.67</b> | <b>0.69</b> | <b>0.72</b> | <b>0.74</b> | <b>0.75</b> |

Table S4: Performance result of applying active learning by evaluating on one single validation dataset for all iterations.



Figure S2: Two samples of applying the proposed ROI detection method.

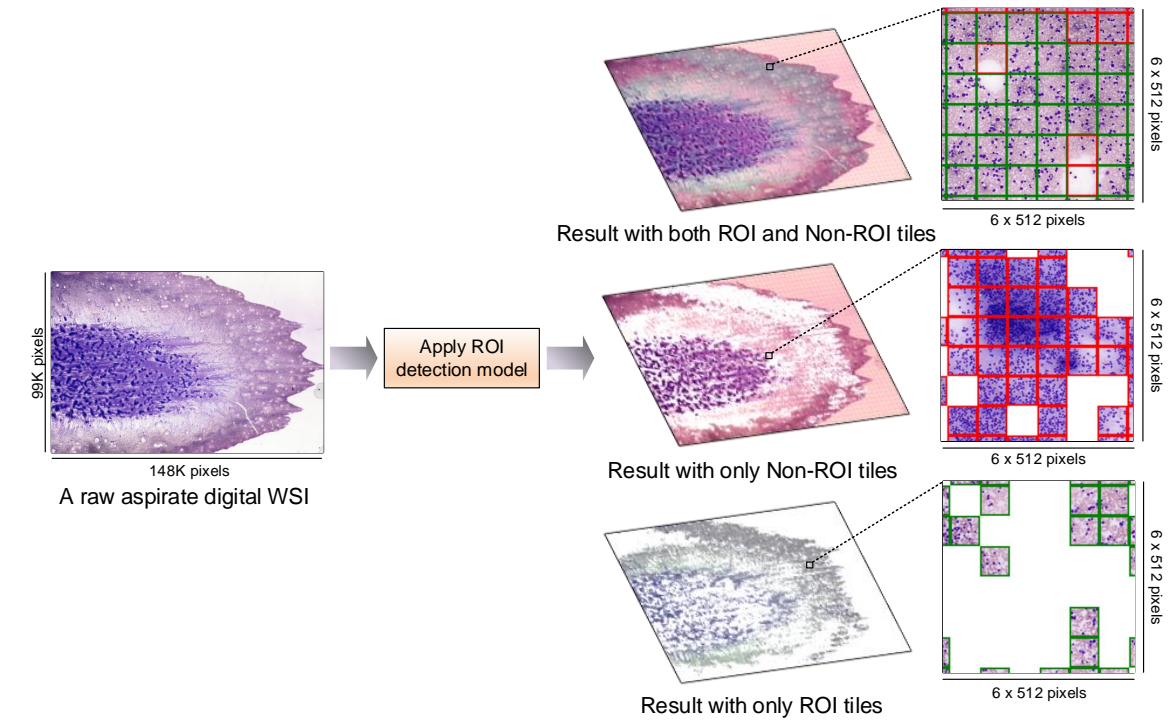

(a)

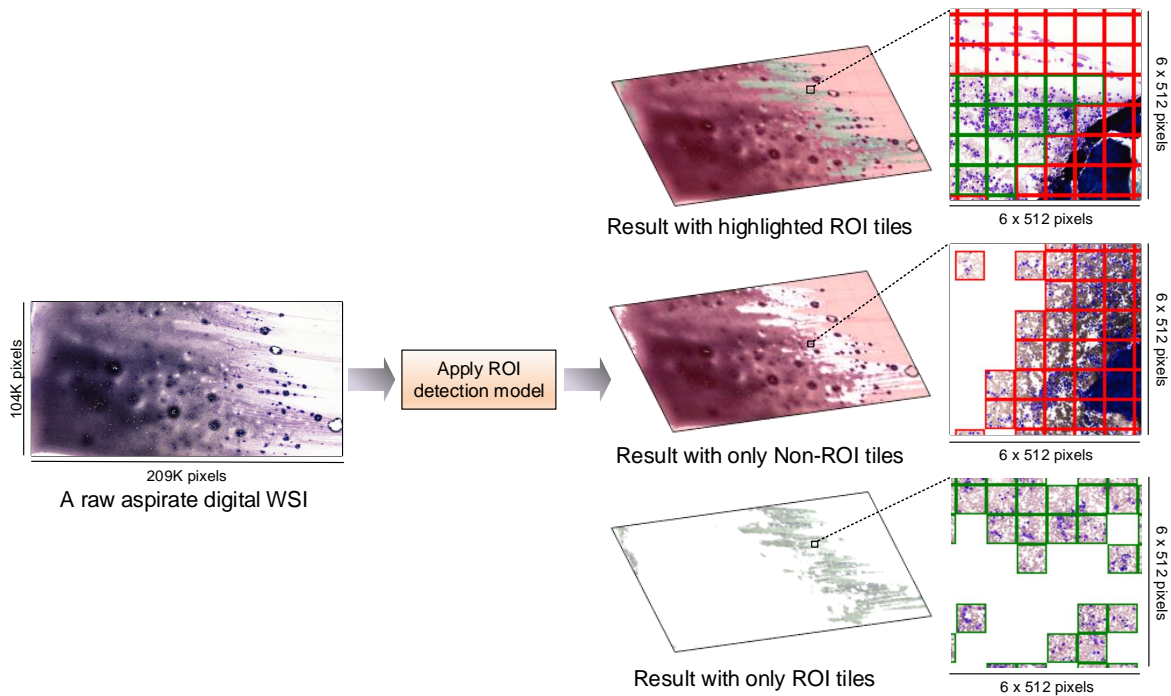

(b)

(a) A sample of applying the proposed region of interest (ROI) detection method on crush (squash) preparation aspirate specimen. (b) A sample of applying the proposed ROI detection method on push preparation aspirate specimen.

Figure S3: Examples of annotated tiles, as region of interest (ROI) and non-region of interest (Non-ROI) for training the proposed ROI detection model.

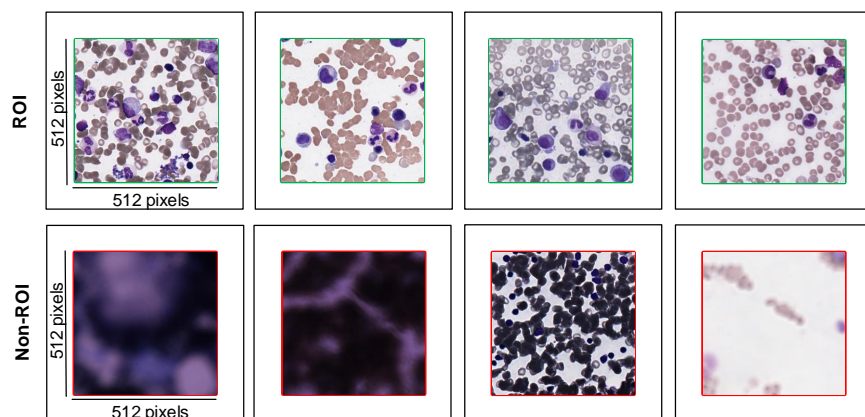

Figure S4: Four Examples of applying the proposed cell detection and classification method to localize cellular objects (white blood cells) and other non-cellular objects and also classify them with the probability in the tiles.

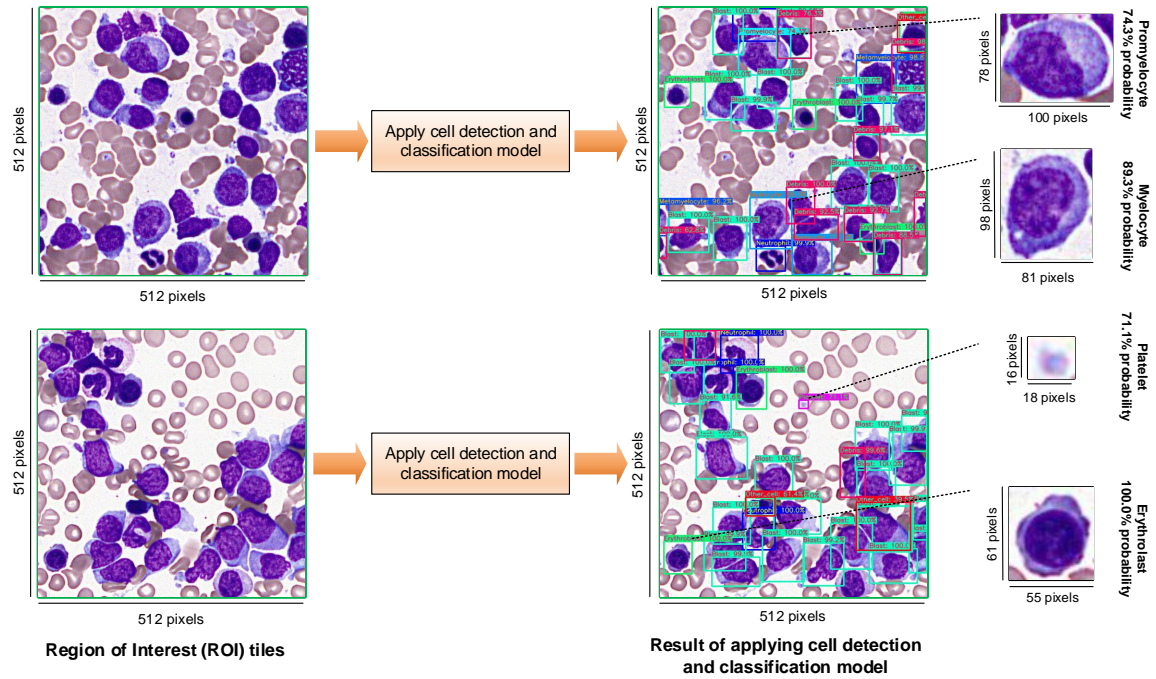

(a)

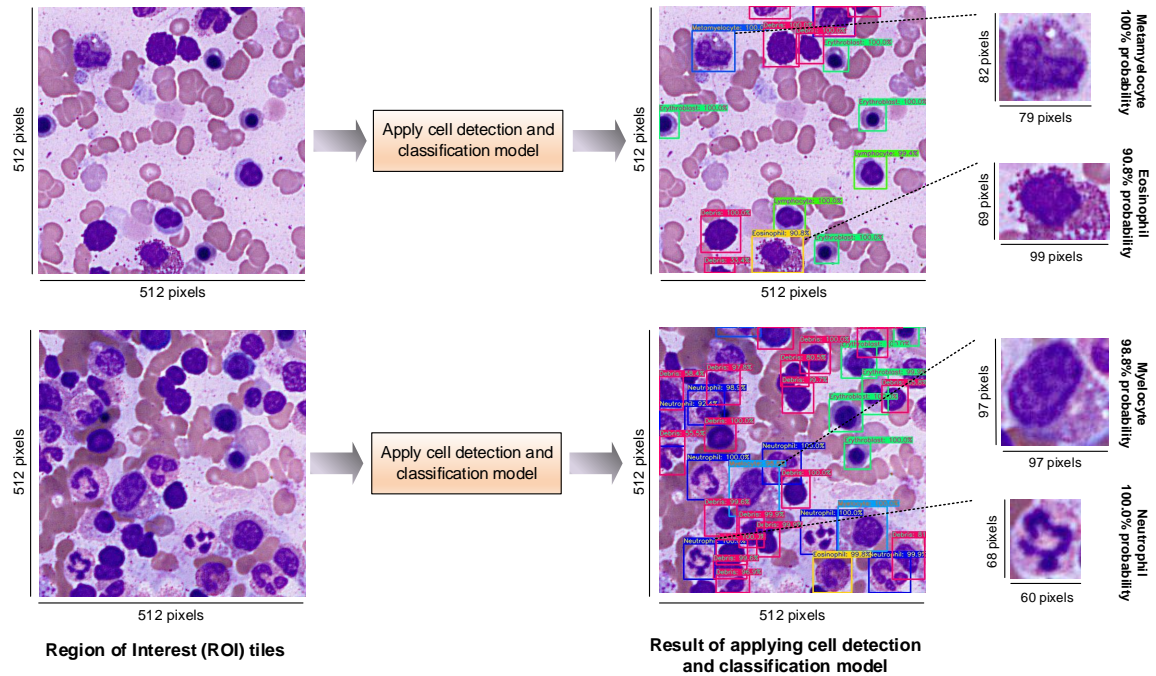

(b)

(a) Samples of applying the proposed cell detection and classification method on push preparation aspirate specimen. (b) Samples of applying the proposed cell detection and classification method on crush (squash) preparation aspirate specimen.

Figure S5: The cross-validation confusion matrix showing the performance of the YOLO cell detection and classification model applied on 16 different cytological and non-cytological object types. Each value represents the percentage of classification per object type across others. Rows indicate the ground-truth object class while columns display the object type predicted by the proposed model. The diagonal values indicate the true positive portion for each object type and the other values, outside of the diagonal, display the misclassification rates.

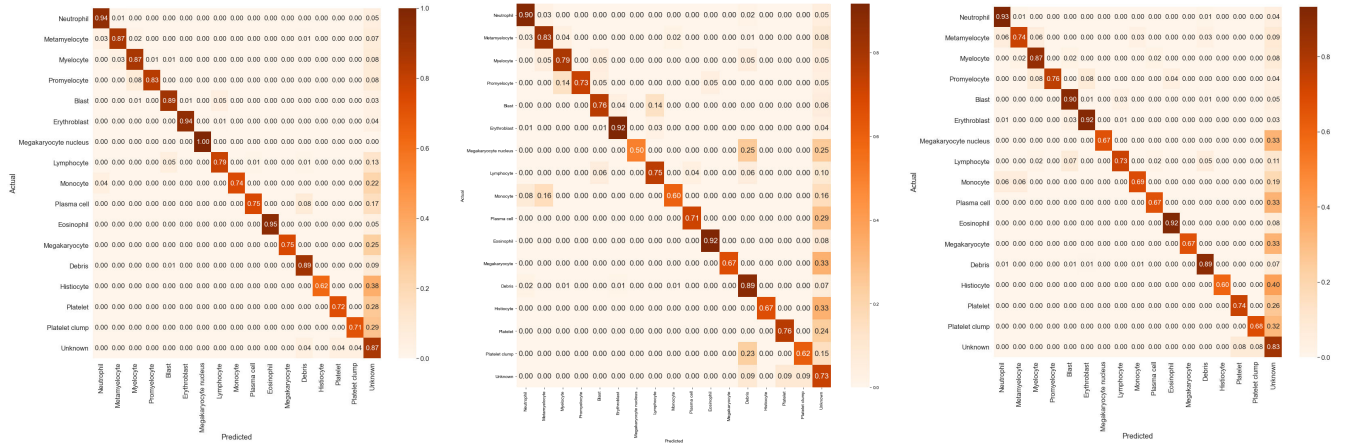

(a) Normal

(b) MDS

(c) Acute myeloid leukemia

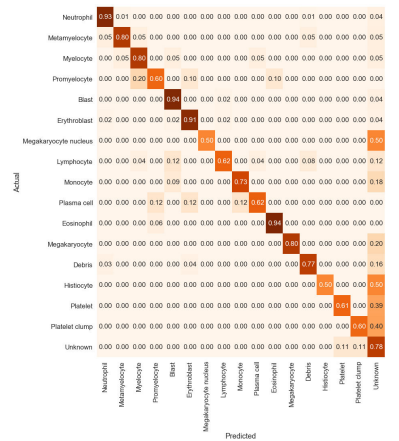

(d) Plasma cell neoplasm

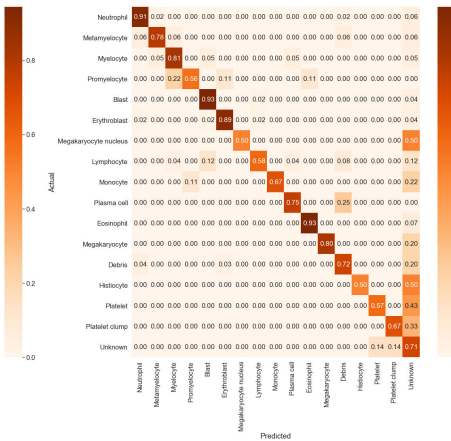

(e) Lymphoproliferative disorder

(a) The confusion matrix of applying the model on patient whole slide image (WSI) with normal diagnostic tags. (b) The confusion matrix of applying the model on patient whole slide image (WSI) with myelodysplastic syndrome (MDS) diagnostic tags. (c) The confusion matrix of applying the model on patient whole slide image (WSI) with acute myeloid leukemia diagnostic tags. (d) The confusion matrix of applying the model on patient whole slide image (WSI) with plasma cell neoplasm diagnostic tags. (e) The confusion matrix of applying the model on patient whole slide image (WSI) with lymphoproliferative disorder diagnostic tags.

Figure S6: Two samples of the clinical validation.

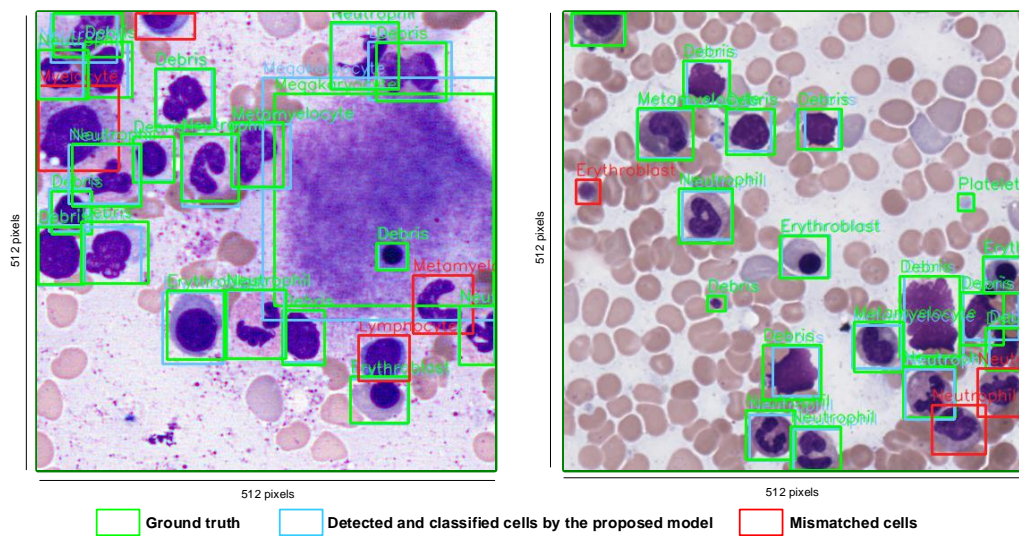

As shown, the result of applying the cell detection and classification model and the ground truth (the tiles checked with hematopathologists) viewed in single image to make it easier to investigate more for validation. Here, green bounding boxes and classes names indicate the ground truth, blue bounding boxes and classes names denote the result of cell detection and classification model which matched the ground truth, and red bounding boxes mark those detected objects that did not match the ground truth; the red class names, indicate the wrong prediction class name by the model.
